# Supplementary material for: Hierarchically structured layered-double-hydroxide@zeolitic-imidazolate-framework derivatives for high-performance electrochemical energy storage
Source: Royal Society of Chemistry journal article supplement (doi:10.1039/c6ta04765c), 2016-01-01
Supplement: c6ta04765c1.pdf [file c6ta04765c1.pdf]

# Electronic Supplementary Material (ESI) for Journal of Materials Chemistry A

# This journal is © The Royal Society of Chemistry 2016

## Hierarchically Structured Layered-Double- Hydroxide@Zeolitic- Imidazolate-Framework Derivatives for High-Performance Electrochemical Energy Storage

Yibo Dou,<sup>a,b</sup> Jian Zhou,<sup>a</sup> Fan Yang,<sup>a</sup> Min-Jian Zhao,<sup>a</sup> Zuoren Nie,<sup>b,\*</sup> and Jian-Rong Li<sup>a,\*</sup>

<sup>a</sup> Beijing Key Laboratory for Green Catalysis and Separation and Department of Chemistry and Chemical Engineering, College of Environmental and Energy Engineering, Beijing University of Technology, Beijing 100124, P. R. China.

E-mail: jrli@bjut.edu.cn. Tel: +86-10-67392332

<sup>b</sup> College of Materials Science and Engineering, Beijing University of Technology, Beijing 100124, P. R. China.

E-mail: zrnjie@bjut.edu.cn. Tel: +86-10-67391536

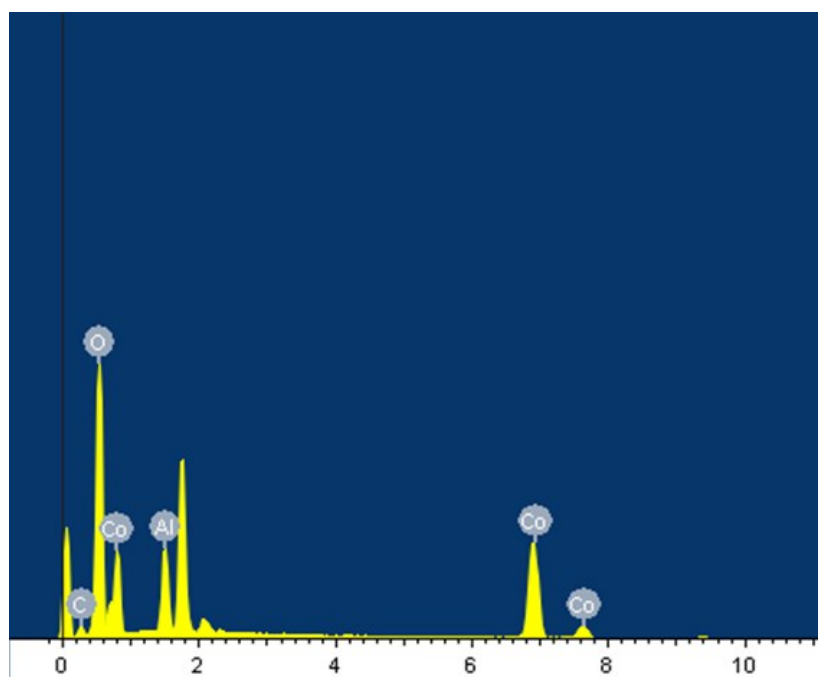

**Figure S1.** EDX spectrum of CoAl-LDH film.

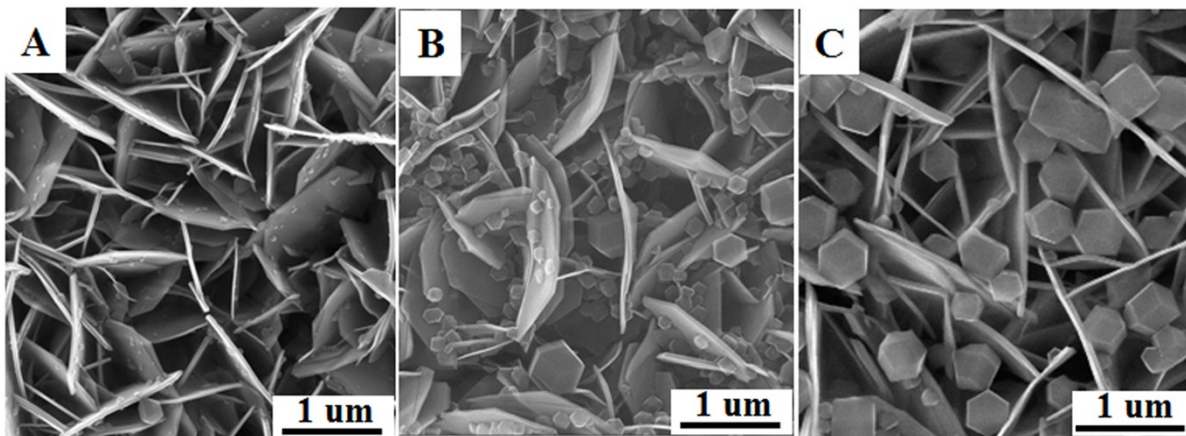

**Figure S2.** SEM images of the CoAl-LDH@ZIF-67 film as a function of reaction time (A) 10 h, (B) 18 h, and (C) 24 h.

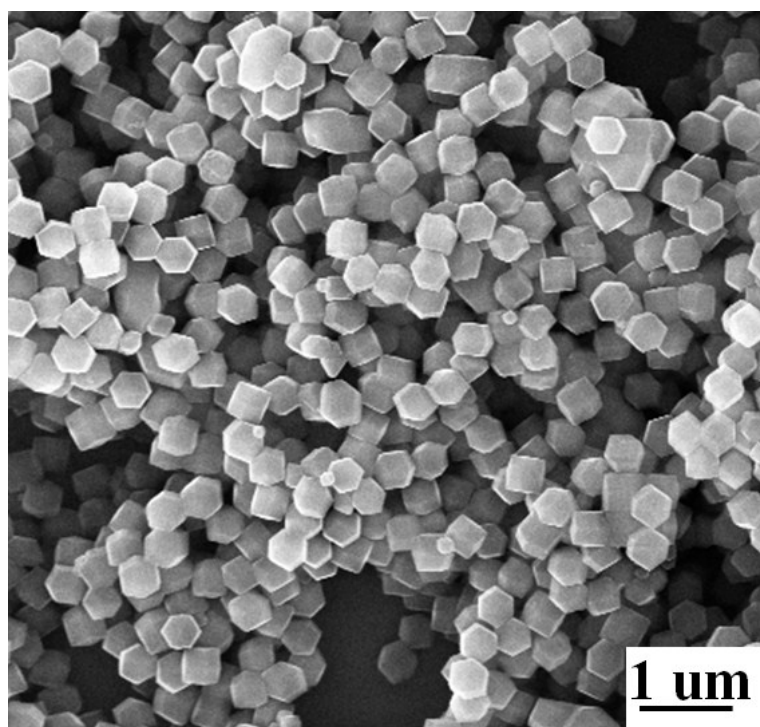

**Figure S3.** SEM image of ZIF-67.

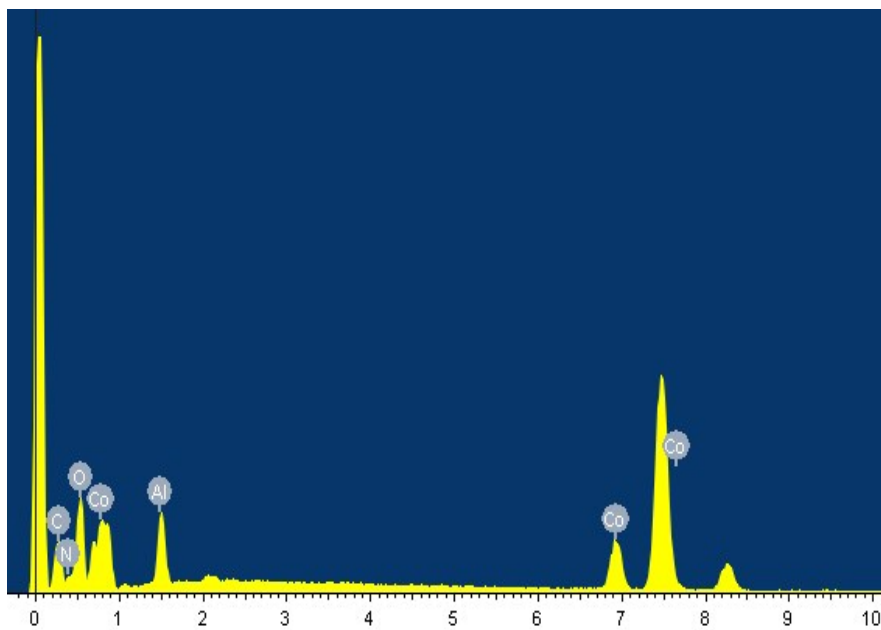

**Figure S4.** EDX spectrum of CoAl-LDH@ZIF-67 film.

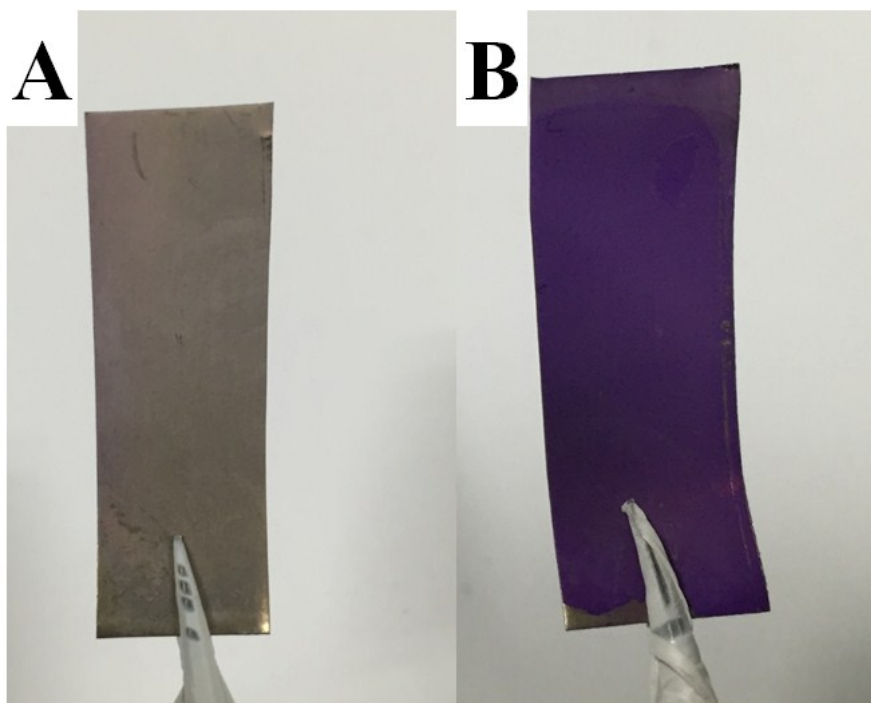

**Figure S5.** Digital photographs of (A) CoAl-LDH and (B) CoAl-LDH@ZIF-67 films.

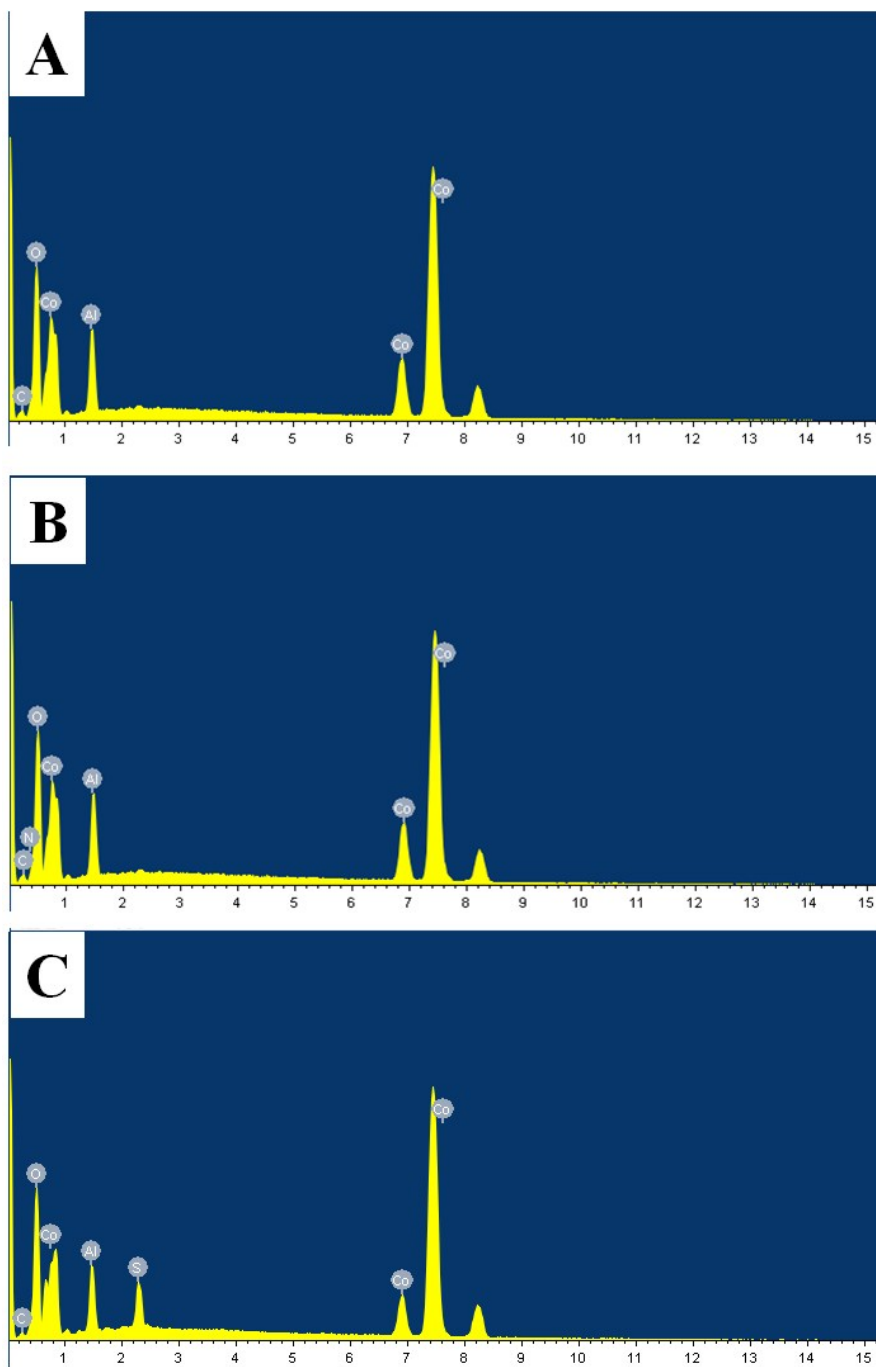

**Figure S6.** EDX spectrum of (A) MMO@Co<sub>3</sub>O<sub>4</sub>, (B) Spinelle@C, and (C) LDH@CoS, respectively.

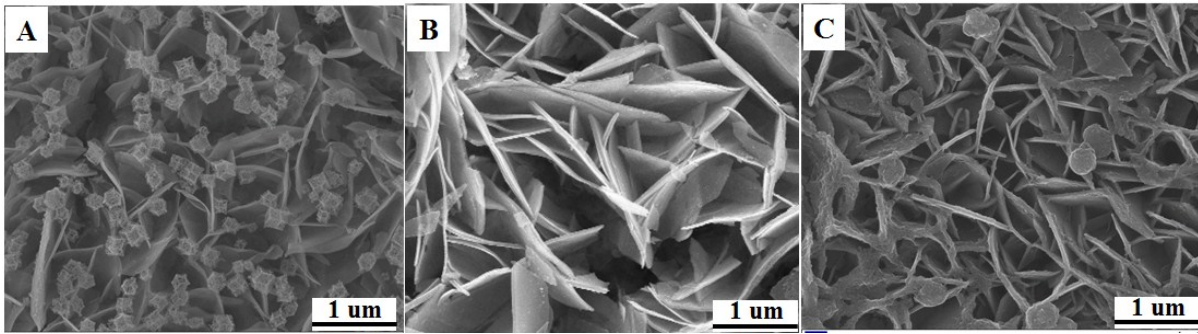

**Figure S7.** SEM images of (A) MMO@Co<sub>3</sub>O<sub>4</sub>, (B) Spinel@C, and (C) LDH@CoS obtained by oxidation at 300 °C under air for 5 h, carbonization at 800 °C under N<sub>2</sub> for 5 h, and sulfurization with thioacetamide for 3 h, respectively.

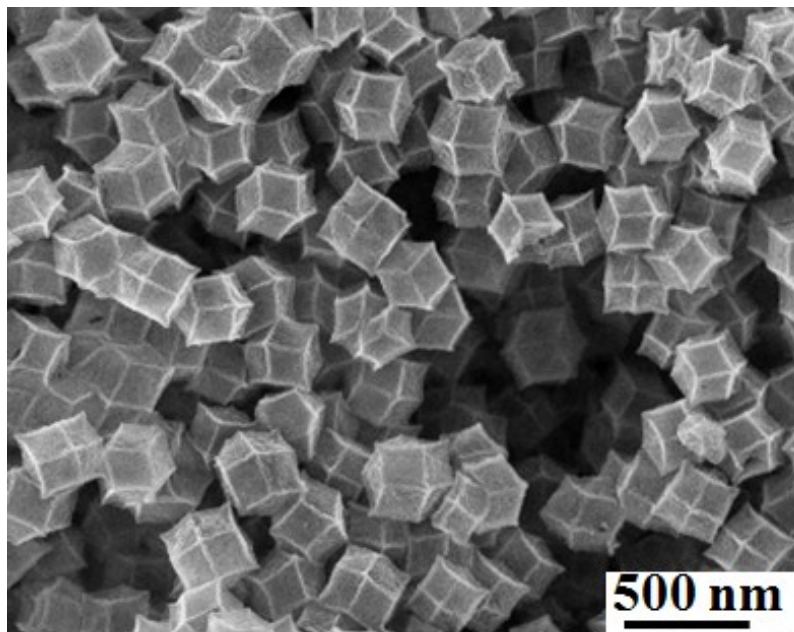

**Figure S8.** SEM image of Co<sub>3</sub>O<sub>4</sub> powder derived from ZIF-67 powder.

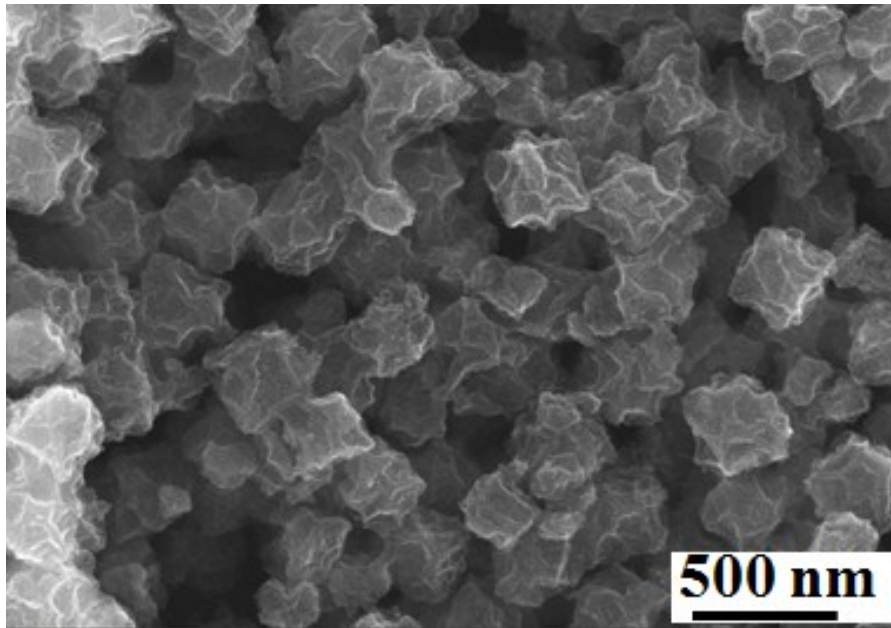

**Figure S9.** SEM image of nitrogen-doped carbon powder derived from ZIF-67 powder.

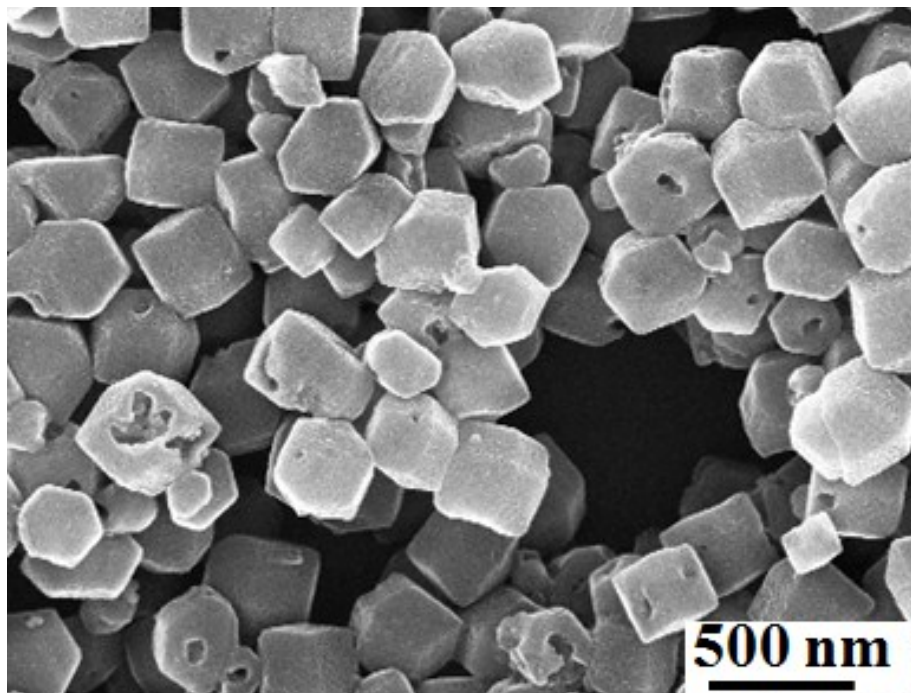

**Figure S10.** SEM image of CoS powder derived from ZIF-67 powder.

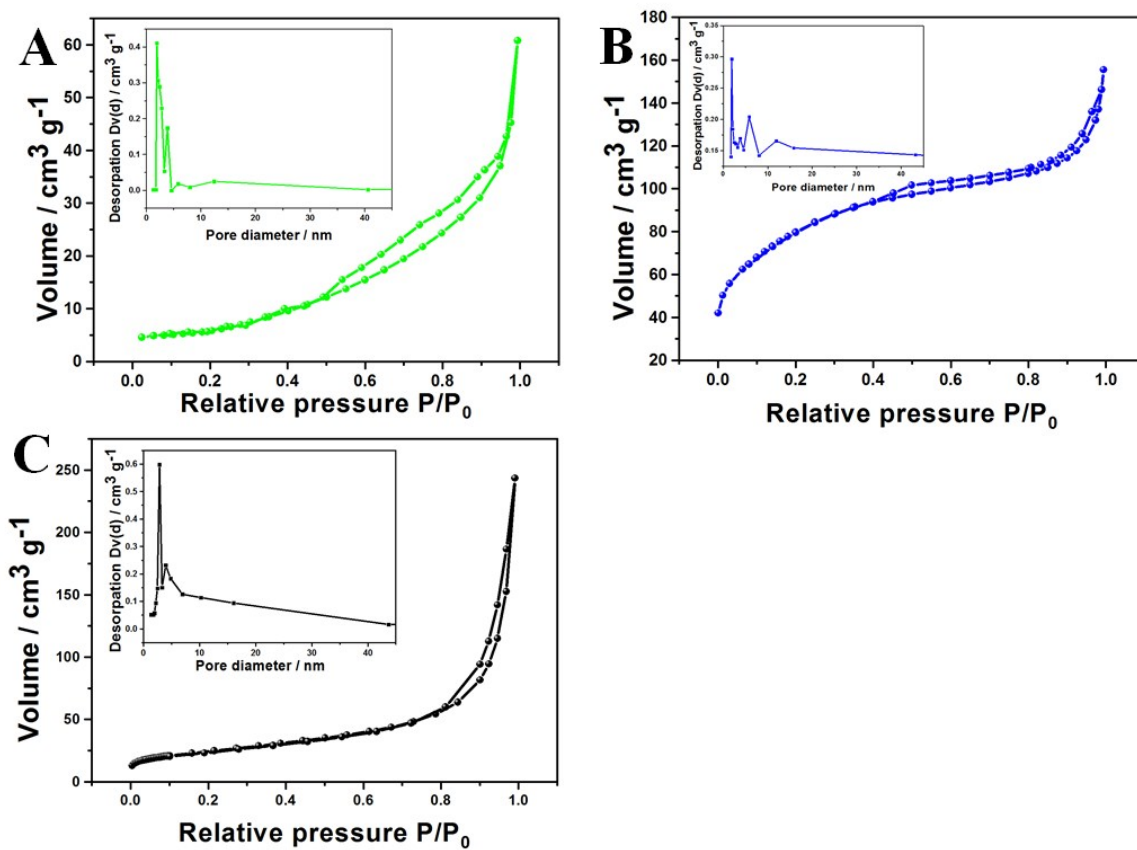

**Figure S11.**  $N_2$  adsorption-desorption isotherms and pore size distributions (inset) of (A)  $MMO@Co_3O_4$ , (B)  $Spinelle@C$ , and (C)  $LDH@CoS$ , respectively.

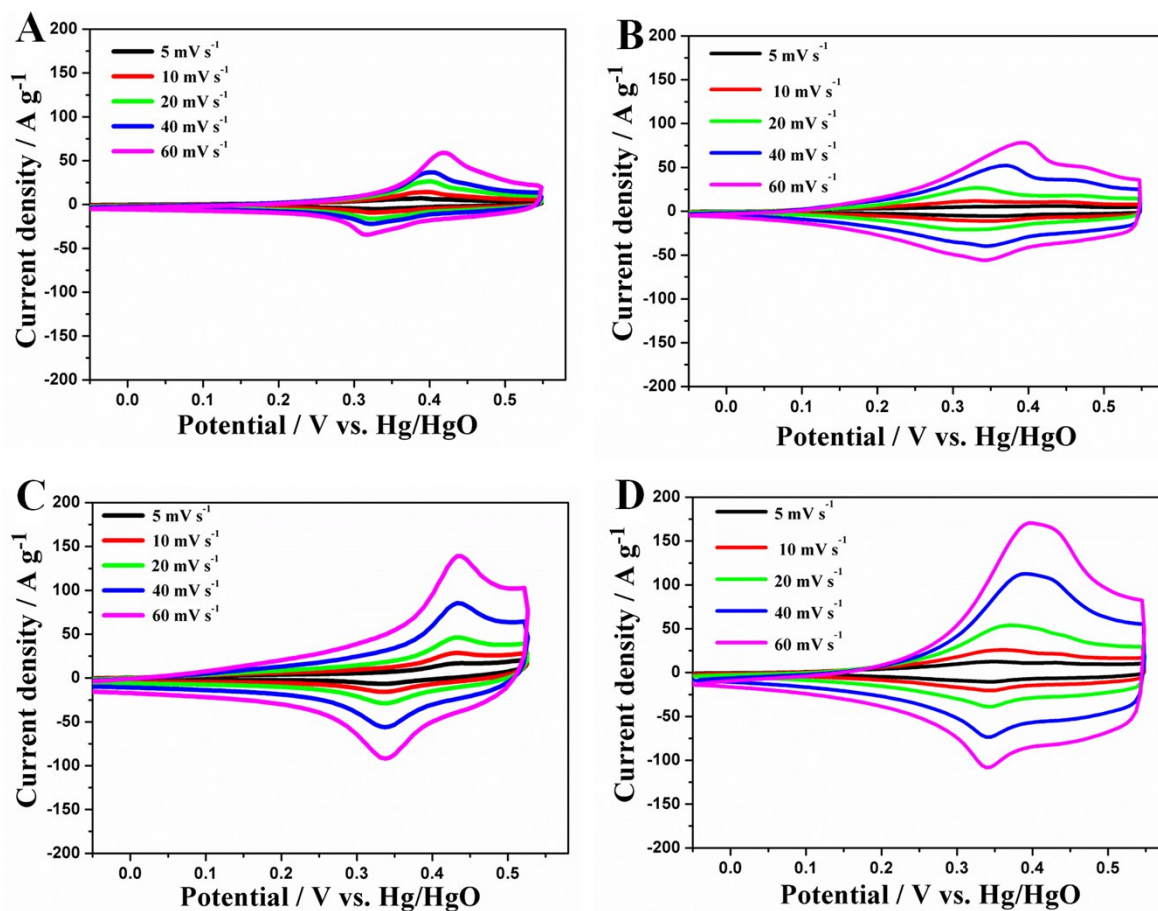

**Figure S12.** CV curves of (A) LDH, (B) MMO@Co<sub>3</sub>O<sub>4</sub>, (C) Spinelle@C, and (D) LDH@CoS at varied scan rates from 5 to 60 mV/s.



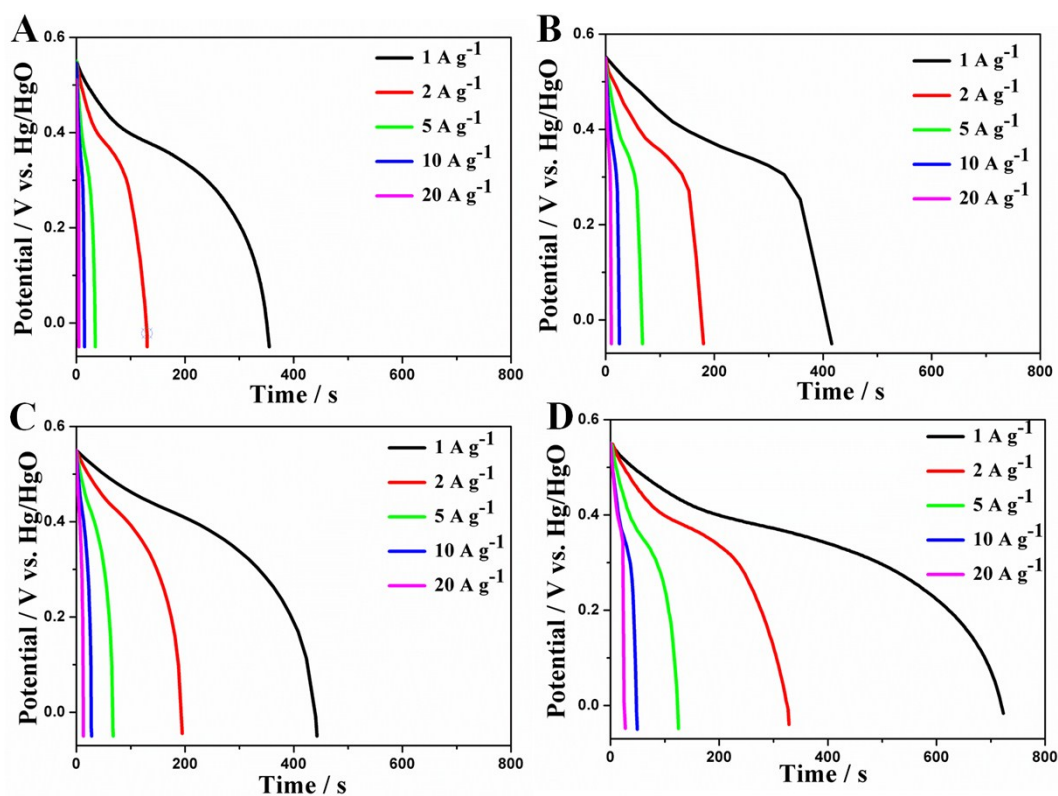

**Figure S13.** Galvanostatic discharge curves of (A) LDH, (B)  $\text{MMO@Co}_3\text{O}_4$ , (C) Spinelle@C, and (D)  $\text{LDH@CoS}$  at varied current densities from 1 to 20 A/g.

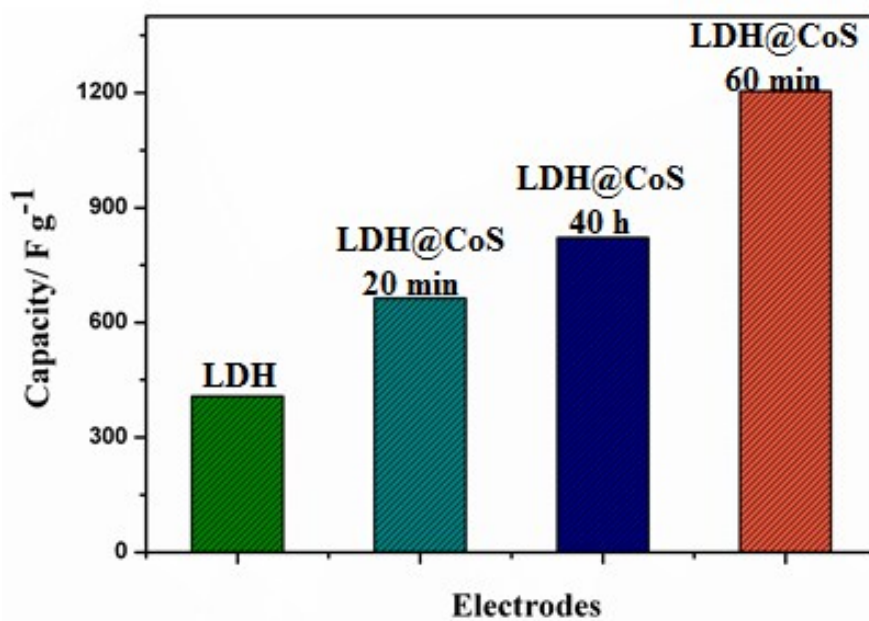

**Figure S14.** Specific capacity of LDH and  $\text{LDH@CoS}$  with varied amounts of CoS that derived based on different sulfurization time of 20, 40, and 60 min, respectively.

**Table S1.** Comparison study of LDH@ZIF-67 derivatives in this work and previously reported MOFs derivatives toward electrochemical energy storage.

| MOFs       | MOFs derivatives                   | Specific capacitance (F g <sup>-1</sup> ) | Current density (A g <sup>-1</sup> ) | Reference |
|------------|------------------------------------|-------------------------------------------|--------------------------------------|-----------|
| MOF-5      | NPC                                | 258                                       | 0.25                                 | 1         |
| Bi/MOF-5   | HPCs                               | 241                                       | 0.1                                  | 2         |
| Al-PCP     | Carbon                             | 232.8                                     | 0.1                                  | 3         |
| ZIF-11     | Nitrogen-doped porous carbon       | 307                                       | 1                                    | 4         |
| ZIF-8      | PCPs                               | 245                                       | 1                                    | 5         |
| IRMOF-3    | N doped Carbon                     | 213                                       | 0.5                                  | 6         |
| HKUST-1    | Cu <sub>1.96</sub> S-C             | 200                                       | 0.5                                  | 7         |
| ZIF-67     | Co <sub>3</sub> O <sub>4</sub> //C | 101                                       | 2                                    | 8         |
| Co-MOF     | Co <sub>3</sub> O <sub>4</sub>     | 150                                       | 1                                    | 9         |
| LDH@ZIF-67 | MMO@Co <sub>3</sub> O <sub>4</sub> | 692                                       | 1                                    | This work |
| LDH@ZIF-67 | Spinelle@C                         | 781                                       | 1                                    | This work |
| LDH@ZIF-67 | LDH@CoS                            | 1205                                      | 1                                    | This work |

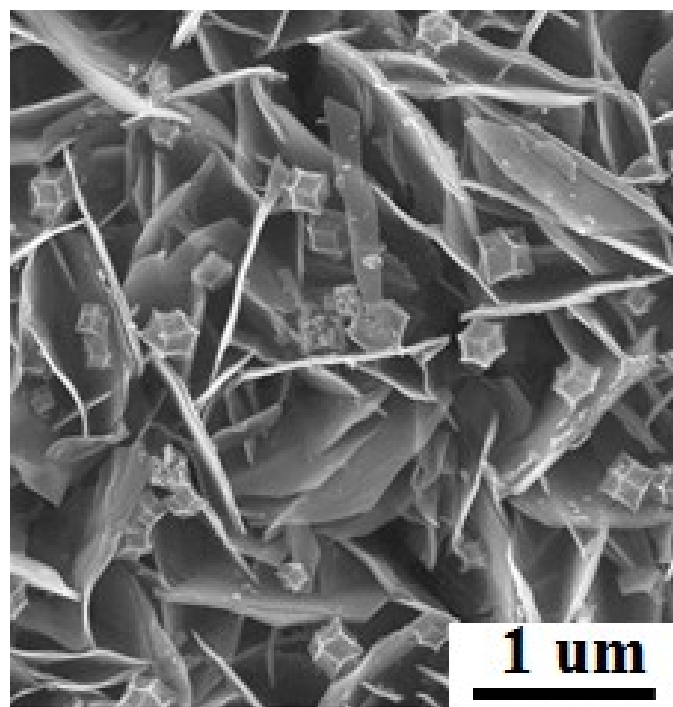

**Figure S15.** SEM image of MMO@Co<sub>3</sub>O<sub>4</sub> after 2000 galvanostatic charge-discharge cycles.

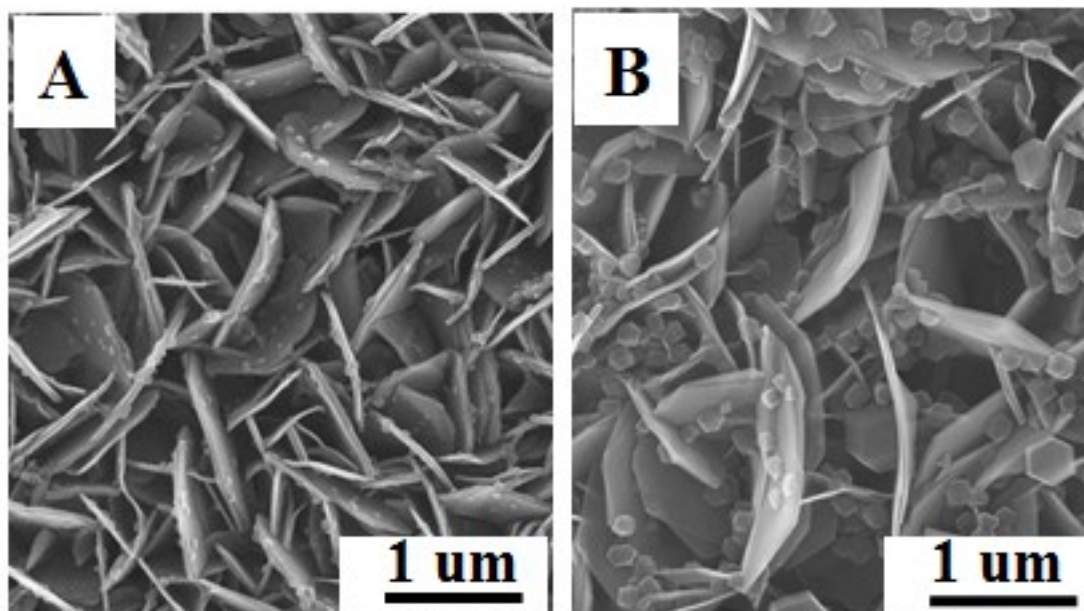

**Figure S16.** SEM images of (A) Spinelle@C and (B) LDH@CoS after 2000 galvanostatic charge-discharge cycles.

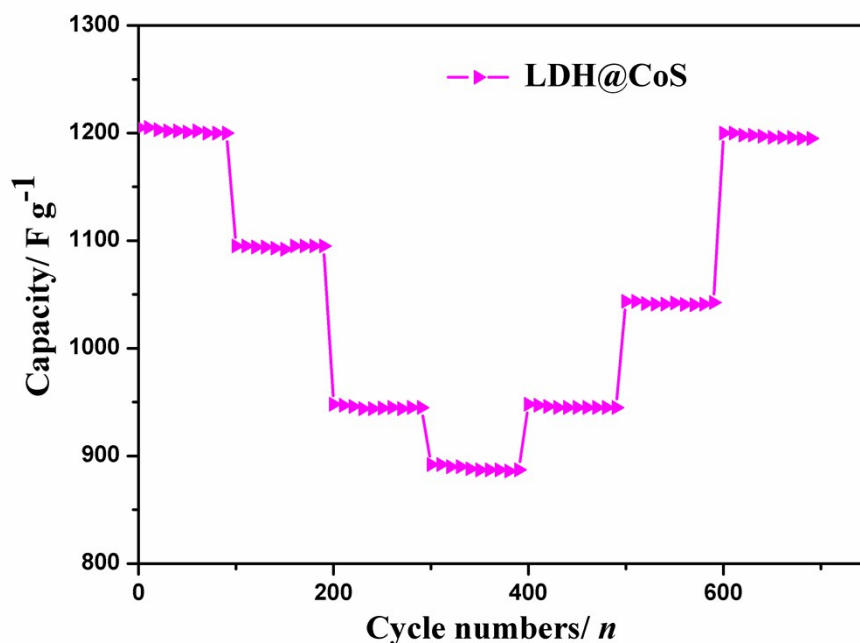

**Figure S17.** Cycling stability of the LDH@CoS at consecutively varied current densities.

## Reference

- 1 B. Liu, H. Shioyama, T. Akita and Q. Xu, *J. Am. Chem. Soc.*, 2008, **130**, 5390–5391.
- 2 S. Mo, Z. Sun, X. Huang, W. Zou, J. Chen and D. Yuan, *Synthetic Met.*, 2012, **162**, 85–88.
- 3 X. Yan, X. Li, Z. Yan and S. Komarneni, *Appl. Surf. Sci.*, 2014, **308**, 306–310.
- 4 F. Hao, L. Li, X. Zhang and J. Chen, *Mater. Res. Bull.*, 2015, **66**, 88–95.
- 5 H. Yi, H. Wang, Y. Jing, T. Peng and X. Wang, *J. Power Sources*, 2015, **285**, 281–290.
- 6 J. Jeon, R. Sharma, P. Meduri, B. W. Arey, H. T. Schaefer, J. L. Lutkenhaus, J. P. Lemmon, P. K. Thallapally, M. I. Nandasiri, B. P. McGrail and S. K. Nune, *ACS Appl. Mater. Inter.*, 2014, **6**, 7214–7222.
- 7 R. Wu, D. P. Wang, V. Kumar, K. Zhou, A. W. K. Law, P. S. Lee, J. Lou and Z. Chen, *Chem. Commun.*, 2015, **51**, 3109–3112.
- 8 R. R. Salunkhe, J. Tang, Y. Kamachi, T. Nakato, J. H. Kim and Y. Yamauchi, *ACS Nano*, 2015, **9**, 6288–6296.
- 9 F. Meng, Z. Fang, Z. Li, W. Xu, M. Wang, Y. Liu, J. Zhang, W. Wang and X. Guo, *J. Mater. Chem. A*, 2013, **1**, 7235–7241.
